# Supplementary material
Source: HighWire-hosted journal article supplement (doi:10.1101/rna.052456.115)

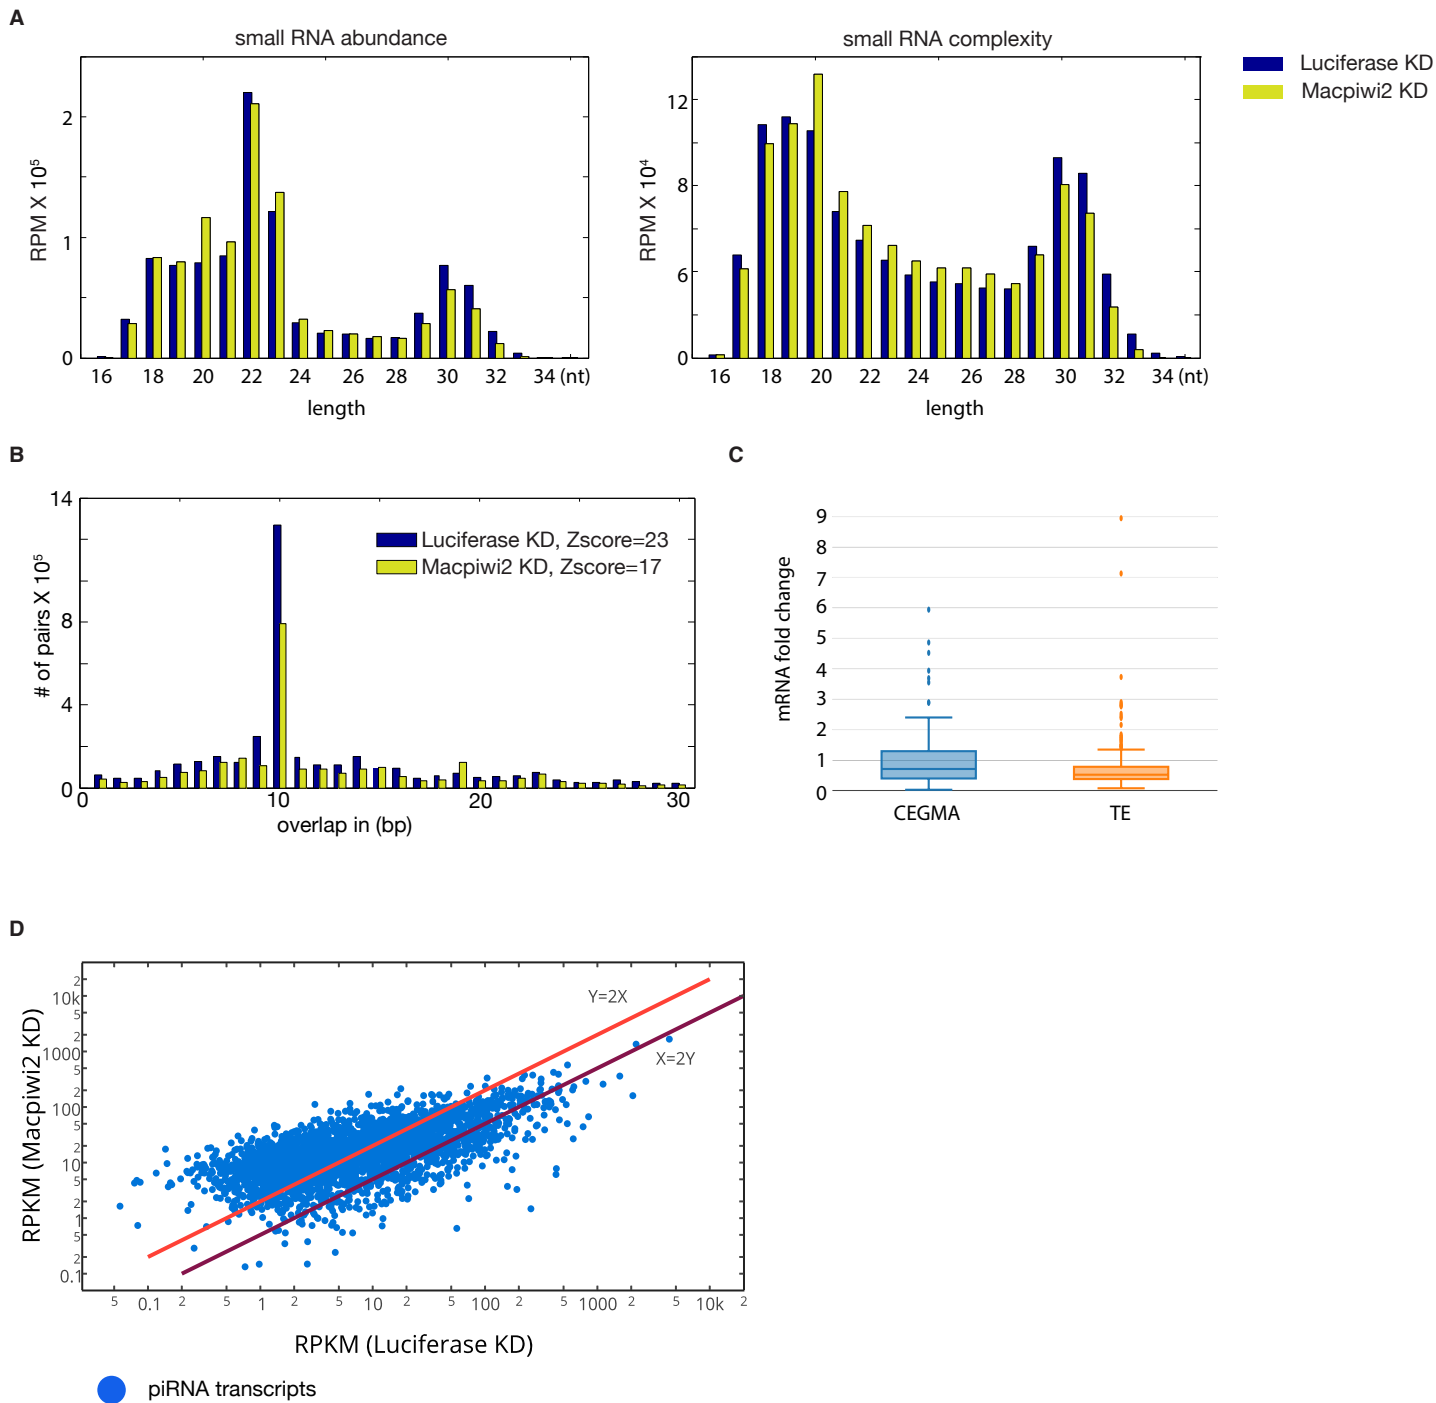

Supplement: Sup_Fig4.pdf [file Sup_Fig4.pdf]
